# Supplementary material
Source: Springer Nature journal article supplement (http://www.springermedizin.de/resource/supplementary/12937_2012_585_MOESM1_ESM.pdf/25653380)
Supplement: MOESM1 [file 25653380]

First phase: search of articles published between Feb. 2001-Sept. 2012 with keywords "dietary biomarkers" (n=1,321)

Second phase of relevance selection: limit keywords to title/abstract (n=251)

Third phase of relevance selection: title/abstract review

Title/abstracts excluded (n=226)

Micronutrient/Antioxidant markers (42)  
Disease/Health markers (87)  
Weight status markers (14)  
Supplement/Medication studies (9)  
Oxidative stress markers (20)  
Dietary function markers (20)  
Pollutant/Toxin markers (9)  
Not relevant to biomarkers (25)

Articles retained for full text review (n=25)

Additional articles identified through reference search (22)

Fourth phase of relevance selection: full text review (n=47)

Full text excluded (n=14)

Micronutrient/Antioxidant markers (2)  
Disease/Health markers (3)  
Supplement/Medication studies (1)  
Dietary function markers (3)  
Questionnaire Development (3)  
Not relevant to biomarkers (2)

Articles retained for review (n=33)
